# Supplementary material
Source: PubMed Central journal article supplement (PMC5041300)
Supplement: NIHMS727240-supplement-FINAL_PRODUCTION_FILE__SDC_1.pdf [file NIHMS727240-supplement-FINAL_PRODUCTION_FILE__SDC_1.pdf]

**Table S1.** Pre-surgery characteristics of LABS-3 participants included vs. excluded from analysis.

|                                             | No. (%) unless otherwise indicated    |                               | <i>p</i> <sup>b</sup> |
|---------------------------------------------|---------------------------------------|-------------------------------|-----------------------|
|                                             | Analysis sample<br>N=165 <sup>a</sup> | Excluded<br>N=34 <sup>a</sup> |                       |
| Sex                                         |                                       |                               | .37                   |
| Male                                        | 30(18.2)                              | 4(11.8)                       |                       |
| Female                                      | 135(81.8)                             | 30(88.2)                      |                       |
| Age, years                                  |                                       |                               | .18                   |
| median (quartiles)                          | 46(37, 54)                            | 43(38,48)                     |                       |
| range                                       | 21-68                                 | 24-62                         |                       |
| Race                                        |                                       |                               | .90                   |
| White                                       | 153(92.7)                             | 31(93.9)                      |                       |
| Black                                       | 11(6.7)                               | 2(6.1)                        |                       |
| Other                                       | 1(0.6)                                | 0(0.0)                        |                       |
| Hispanic ethnicity                          |                                       |                               |                       |
| No                                          | 158(95.8)                             | 31(91.2)                      |                       |
| Yes                                         | 7(4.2)                                | 3(8.8)                        | .27                   |
| Married/ living as married                  |                                       |                               | .49                   |
| No                                          | 60(38.7)                              | 11(32.4)                      |                       |
| Yes                                         | 95(61.3)                              | 23(67.6)                      |                       |
| Education                                   |                                       |                               | .99                   |
| High school or less                         | 27(17.5)                              | 6(17.6)                       |                       |
| Some post high school education             | 66(42.9)                              | 15(44.1)                      |                       |
| College degree or higher                    | 61(39.6)                              | 13(38.2)                      |                       |
| Employed                                    |                                       |                               | .71                   |
| No                                          | 46(29.7)                              | 9(26.5)                       |                       |
| Yes                                         | 109(70.3)                             | 25(73.5)                      |                       |
| Household income                            |                                       |                               | .80                   |
| Less than \$25,000                          | 26(16.7)                              | 6(19.4)                       |                       |
| \$25,000-\$49,000                           | 48(30.8)                              | 6(19.4)                       |                       |
| \$50,000-\$74,999                           | 38(24.4)                              | 9(29.0)                       |                       |
| \$75,000-\$99,999                           | 22(14.1)                              | 5(16.1)                       |                       |
| \$100,000 or more                           | 22(14.1)                              | 5(16.1)                       |                       |
| Body Mass Index, kg/m <sup>2</sup>          |                                       |                               | .70                   |
| median (quartiles)                          | 44.8(42.1, 49.0)                      | 45.5(40.4, 51.6)              |                       |
| range                                       | 33.5-76.0                             | 33.2-64.0                     |                       |
| Any psychiatric disorder                    |                                       |                               | .74                   |
| No                                          | 112(69.6)                             | 22(66.7)                      |                       |
| Yes                                         | 49(30.4)                              | 11(33.3)                      |                       |
| Any mood disorder                           |                                       |                               | .61                   |
| No                                          | 144(87.8)                             | 30(90.9)                      |                       |
| Yes                                         | 20(12.2)                              | 3(9.1)                        |                       |
| Any anxiety disorder                        |                                       |                               | .38                   |
| No                                          | 135(82.8)                             | 26(76.5)                      |                       |
| Yes                                         | 28(17.2)                              | 8(23.5)                       |                       |
| Any schizophrenia /other psychotic disorder |                                       |                               | .65                   |
| No                                          | 164(99.4)                             | 34(100.0)                     |                       |
| Yes                                         | 1(0.6)                                | 0(0.0)                        |                       |

|                                     | No. (%) unless otherwise indicated    |                               | <i>p</i> <sup>b</sup> |
|-------------------------------------|---------------------------------------|-------------------------------|-----------------------|
|                                     | Analysis sample<br>N=165 <sup>a</sup> | Excluded<br>N=34 <sup>a</sup> |                       |
| Any substance use disorder          |                                       |                               | .52                   |
| No                                  | 161(98.8)                             | 34(100.0)                     |                       |
| Yes                                 | 2(1.2)                                | 0(0.0)                        |                       |
| Any somatoform disorder             |                                       |                               | .52                   |
| No                                  | 162(98.8)                             | 33(100.0)                     |                       |
| Yes                                 | 2(1.2)                                | 0(0.0)                        |                       |
| Any eating disorder (without EDNOS) |                                       |                               | .37                   |
| No                                  | 152(92.7)                             | 32(97.0)                      |                       |
| Yes                                 | 12(7.3)                               | 1(3.0)                        |                       |
| Adjustment disorder                 |                                       |                               | .21                   |
| No                                  | 163(99.4)                             | 32(97.0)                      |                       |
| Yes                                 | 1(0.6)                                | 1(3.0)                        |                       |
| Other DSM-IV Axis disorder          |                                       |                               | .52                   |
| No                                  | 162(98.8)                             | 33(100.0)                     |                       |
| Yes                                 | 2(1.2)                                | 0(0.0)                        |                       |
| Any psychiatric medication          |                                       |                               | .62                   |
| No                                  | 92(59.0)                              | 21(63.6)                      |                       |
| Yes                                 | 64(41.0)                              | 12(36.4)                      |                       |
| Anti-depressant medication          |                                       |                               | .31                   |
| No                                  | 94(60.3)                              | 23(69.7)                      |                       |
| Yes                                 | 62(39.7)                              | 10(30.3)                      |                       |
| Anti-anxiety medication             |                                       |                               | .10                   |
| No                                  | 144(92.3)                             | 32(100.0)                     |                       |
| Yes                                 | 12(7.7)                               | 0(0.0)                        |                       |
| Other psychiatric medication        |                                       |                               | .054                  |
| No                                  | 150(96.2)                             | 29(87.9)                      |                       |
| Yes                                 | 6(3.8)                                | 4(12.1)                       |                       |

EDNOS= Eating Disorder Not Otherwise Specified; DSM-IV = Diagnostic and Statistical Manual of Mental Disorders-IV  
<sup>a</sup>The number of participants across categories may not sum to the total number of participants because of missing data.

<sup>b</sup>Chi square test for dichotomous variables; Wilcoxon rank sum test for continuous variables.

**Table S2.** Risk of mood and anxiety disorders at 2 and 3 years post-surgery.

|                                                                                  | Post-surgery status |                       |      |                      |                   |       |
|----------------------------------------------------------------------------------|---------------------|-----------------------|------|----------------------|-------------------|-------|
|                                                                                  | Any mood disorder   |                       |      | Any anxiety disorder |                   |       |
|                                                                                  | N                   | RR (95%CI)            | p    | N                    | RR (95%CI)        | p     |
| Pre-surgery disorder of specified outcome                                        |                     | <sup>a</sup>          | .002 |                      | <sup>b</sup>      | <.001 |
| Age, per 10 years                                                                | 163                 | <sup>a</sup>          | .86  | 163                  | <sup>b</sup>      | .35   |
| Pre-surgery disorder*Age interaction                                             |                     | <sup>a</sup>          | .015 |                      | <sup>b</sup>      | .007  |
| Pre-surgery disorder of specified outcome (ref. = no lifetime/no current) by age | 89                  |                       |      | 112                  |                   |       |
| Yes lifetime/no current                                                          | 55                  |                       |      | 23                   |                   |       |
| At 25%tile age (37)                                                              |                     | 53.86(5.13-565.91)    |      |                      | 0.98(0.11-9.10)   |       |
| At median age (46)                                                               |                     | 12.82(2.01-81.84)     |      |                      | 1.04(0.18-6.08)   |       |
| At 75%tile age (54)                                                              |                     | 3.58(0.59-21.81)      |      |                      | 1.10(0.23-5.33)   |       |
| Yes lifetime/yes current                                                         | 19                  |                       |      | 28                   |                   |       |
| At 25%tile age (37)                                                              |                     | 230.43(24.41-2174.94) |      |                      | 12.34(3.79-40.13) |       |
| At median age (46)                                                               |                     | 54.77(11.07-271.02)   |      |                      | 5.48(1.99-15.13)  |       |
| At 75%tile age (54)                                                              |                     | 15.27(3.36-69.33)     |      |                      | 2.67(0.87-8.13)   |       |
| Age, per 10 years by psychiatric status                                          | 163                 |                       |      | 163                  |                   |       |
| No lifetime/no current                                                           |                     | 3.01(1.15-7.88)       |      |                      | 1.53(0.89-2.63)   |       |
| Yes lifetime/no current                                                          |                     | 0.61(0.34-1.08)       |      |                      | 1.64(0.84-3.20)   |       |
| Yes lifetime/yes current                                                         |                     | 0.61(0.32-1.18)       |      |                      | 0.62(0.41-0.94)   |       |
| Gender                                                                           |                     |                       |      |                      |                   |       |
| Males                                                                            | 30                  | Ref.                  | -    | 30                   | Ref.              | -     |
| Females                                                                          | 133                 | 1.38(0.40-4.75)       | .61  | 133                  | 1.05(0.37-2.97)   | .93   |
| Race                                                                             |                     |                       |      |                      |                   |       |
| Non-white                                                                        | 12                  | Ref.                  | -    | 12                   | Ref.              | -     |
| White                                                                            | 151                 | 0.40(0.17-0.95)       | .037 | 151                  | 3.11(0.25-38.68)  | .37   |
| Pre-surgery BMI, per 5 kg/m <sup>2</sup>                                         | 163                 | 0.96(0.74-1.24)       | .76  | 163                  | 0.95(0.74-1.22)   | .66   |
| Surgical procedure                                                               |                     |                       |      | 12                   |                   |       |
| LAGB                                                                             | 66                  | Ref.                  | -    | 66                   | Ref.              | -     |
| RYGB/Sleeve                                                                      | 97                  | 0.72(0.13-4.17)       | .71  | 97                   | 1.17(0.42-3.24)   | .76   |
| % weight loss, per 5 %                                                           | 163                 | 0.96(0.73-1.26)       | .77  | 163                  | 0.96(0.84-1.09)   | .54   |
| Time point                                                                       |                     |                       |      |                      |                   |       |
| 2 years                                                                          | 163                 | Ref.                  | -    | 163                  | Ref.              | -     |
| 3 years                                                                          | 163                 | 1.63(0.86-3.10)       | .13  | 163                  | 0.58(0.33-1.03)   | .061  |

<sup>a</sup> Pre-surgery mood disorder has an significant interaction with age.

<sup>b</sup> Pre-surgery anxiety disorder has an significant interaction with age.

**Table S3.** Independent associations\* between pre-surgery psychiatric status and pre- to post-surgery change in weight over three years.

|                                                             | % weight change |                             |     |
|-------------------------------------------------------------|-----------------|-----------------------------|-----|
|                                                             | N               | $\beta$ coefficient (95%CI) | p   |
| <b>Any mood disorder</b> (ref. = no lifetime/no current)    | 87              |                             | .71 |
| Yes lifetime/no current                                     | 55              | 1.2(-2.5-4.9)               |     |
| Yes lifetime/yes current                                    | 18              | 2.0(-3.4-7.3)               |     |
| <b>Any anxiety disorder</b> (ref. = no lifetime/no current) | 110             |                             | .19 |
| Yes lifetime/no current                                     | 22              | -0.3(-5.3-4.6)              |     |
| Yes lifetime/yes current                                    | 28              | -4.2(-8.9-0.5)              |     |
| <b>Any eating disorder</b> (ref. = no lifetime/no current)  | 135             |                             | .99 |
| Yes lifetime/no current                                     | 13              | -0.4(-6.5-5.7)              |     |
| Yes lifetime/yes current                                    | 12              | -0.3(-6.4-5.8)              |     |
| <b>Any substance use disorder</b> (ref. = no lifetime**)    | 105             |                             |     |
| Yes lifetime                                                | 55              | -2.4(-5.8-1.0)              | .16 |

\*A linear mixed model included the four psychiatric variables described in the table with adjustment for site, age, sex, race, pre-surgery BMI, and surgical procedure (n=160).

\*\*Current substance use disorder at time of surgery was too rare to model.
